# Supplementary material for: Deciphering core proteins of osteoporosis with iron accumulation by proteomics in human bone
Source: PubMed Central journal article supplement (PMC9614156; doi:10.3389/fendo.2022.961903), 2022-10-14
Supplement: DataSheet_1.pdf [file DataSheet_1.pdf]

# Supplementary Materials for

## **Deciphering Core Proteins of Osteoporosis with Iron Accumulation**

### **by Proteomics in Human Bone**

Aifei Wang<sup>1†</sup>, Hui Zhang<sup>1†</sup>, Guangfei Li<sup>1†</sup>, Bin Chen<sup>1†</sup>, Junjie Li<sup>1</sup>, Tao Zhang<sup>4</sup>,  
Baoshan Liu<sup>1</sup>, Zihou Cao<sup>1</sup>, Gongwen Liu<sup>2</sup>, Peng Jia<sup>1\*</sup> and Youjia Xu<sup>1,3\*</sup>

<sup>1</sup>*Department of Orthopedics, Second Affiliated Hospital of Soochow University, Suzhou, China,*

<sup>2</sup>*Department of Orthopedics, Suzhou Hospital of Traditional Chinese Medicine, Suzhou, China,*

<sup>3</sup>*Osteoporosis Institute, Soochow University, Suzhou, China,* <sup>4</sup>*Cambridge-Suda Genomic Resource Centre, Soochow University, Suzhou, China*

\*Correspondence: Peng Jia, [jiapengorthop@163.com](mailto:jiapengorthop@163.com)

Youjia Xu, [xuyoujia@suda.edu.cn](mailto:xuyoujia@suda.edu.cn)

†These authors contributed equally to this work and share first authorship.

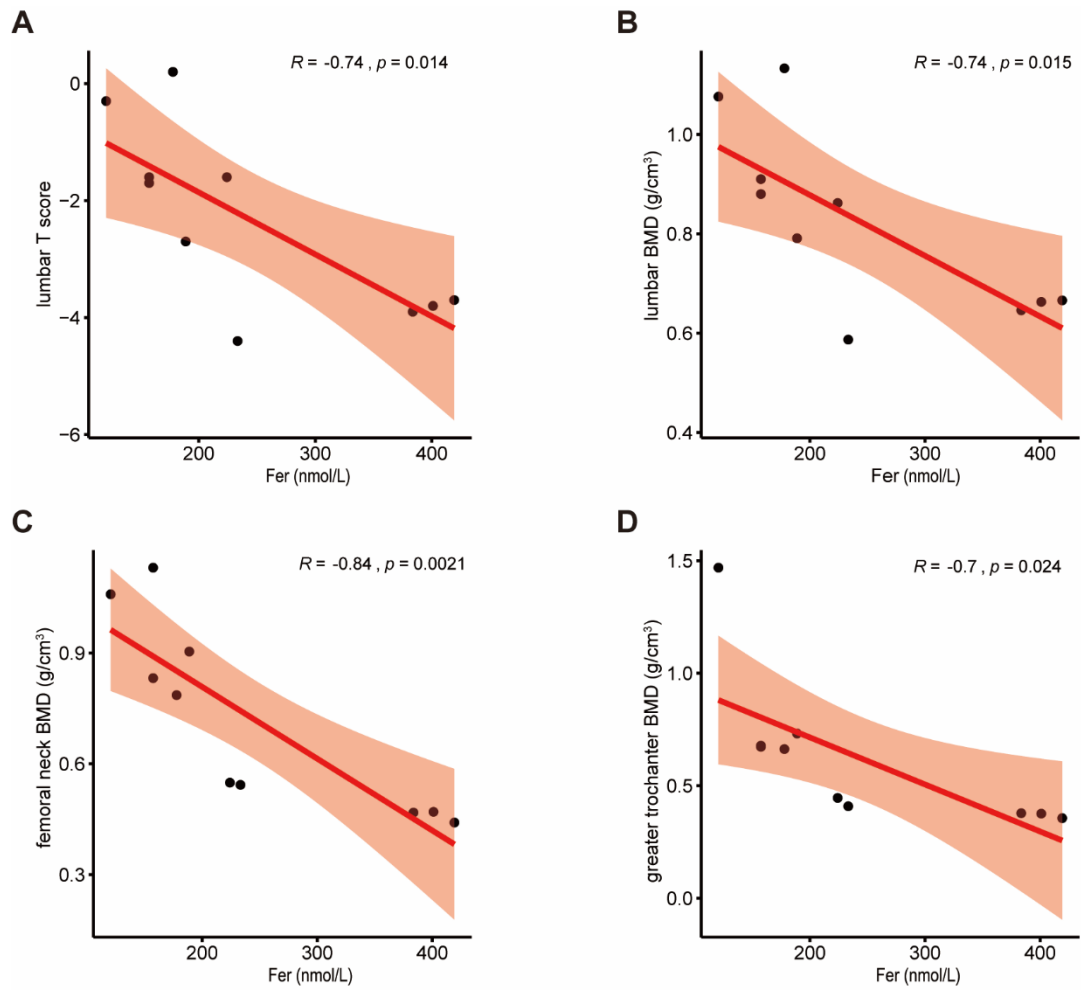

**Supplementary Figure 1 |** Correlation analysis of bone mass index and serum ferritin. **(A)** Pearson correlation analysis of lumbar T score and serum ferritin. **(B)** Pearson correlation analysis of lumbar BMD and serum ferritin. **(C)** Pearson correlation analysis of femoral neck BMD and serum ferritin. **(D)** Pearson correlation analysis of greater trochanter BMD and serum ferritin.

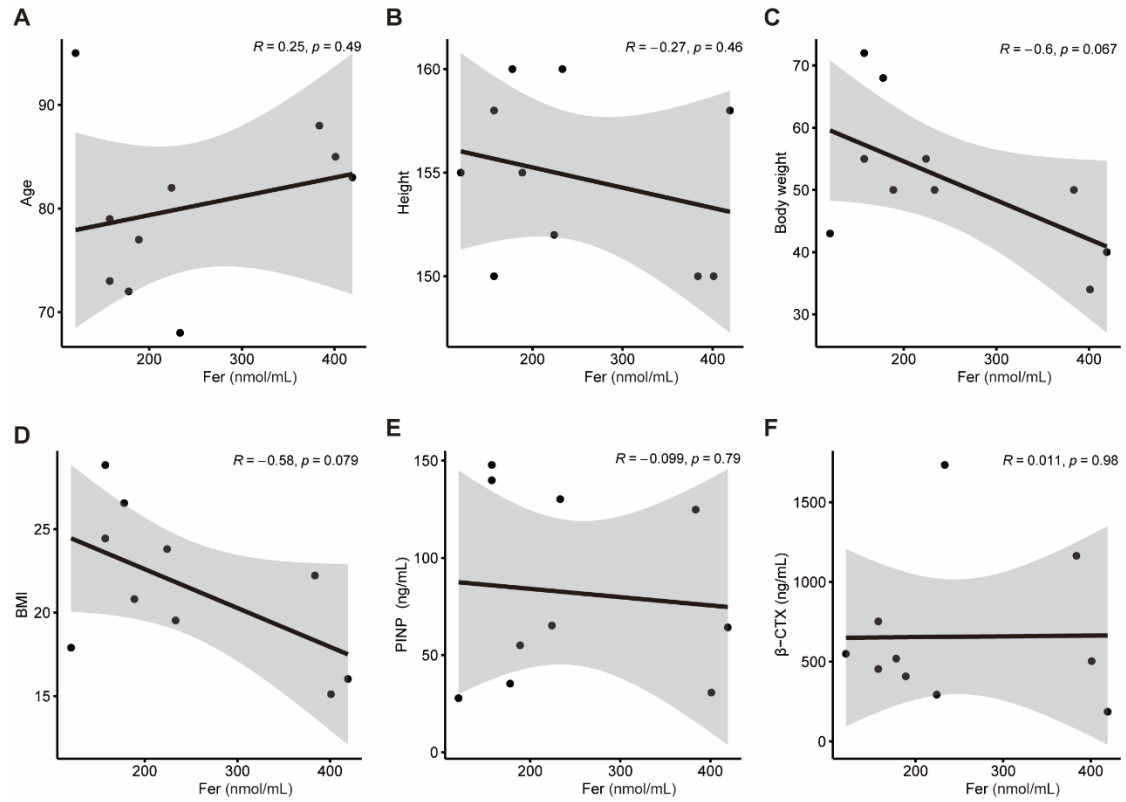

**Supplementary Figure 2 |** Correlation analysis of general clinical index and serum ferritin. **(A)** Pearson correlation analysis of age and serum ferritin. **(B)** Pearson correlation analysis of height and serum ferritin. **(C)** Pearson correlation analysis of body weight and serum ferritin. **(D)** Pearson correlation analysis of BMI and serum ferritin. **(E)** Pearson correlation analysis of serum PINP and serum ferritin. **(F)** Pearson correlation analysis of serum  $\beta$ -CTX and serum ferritin.

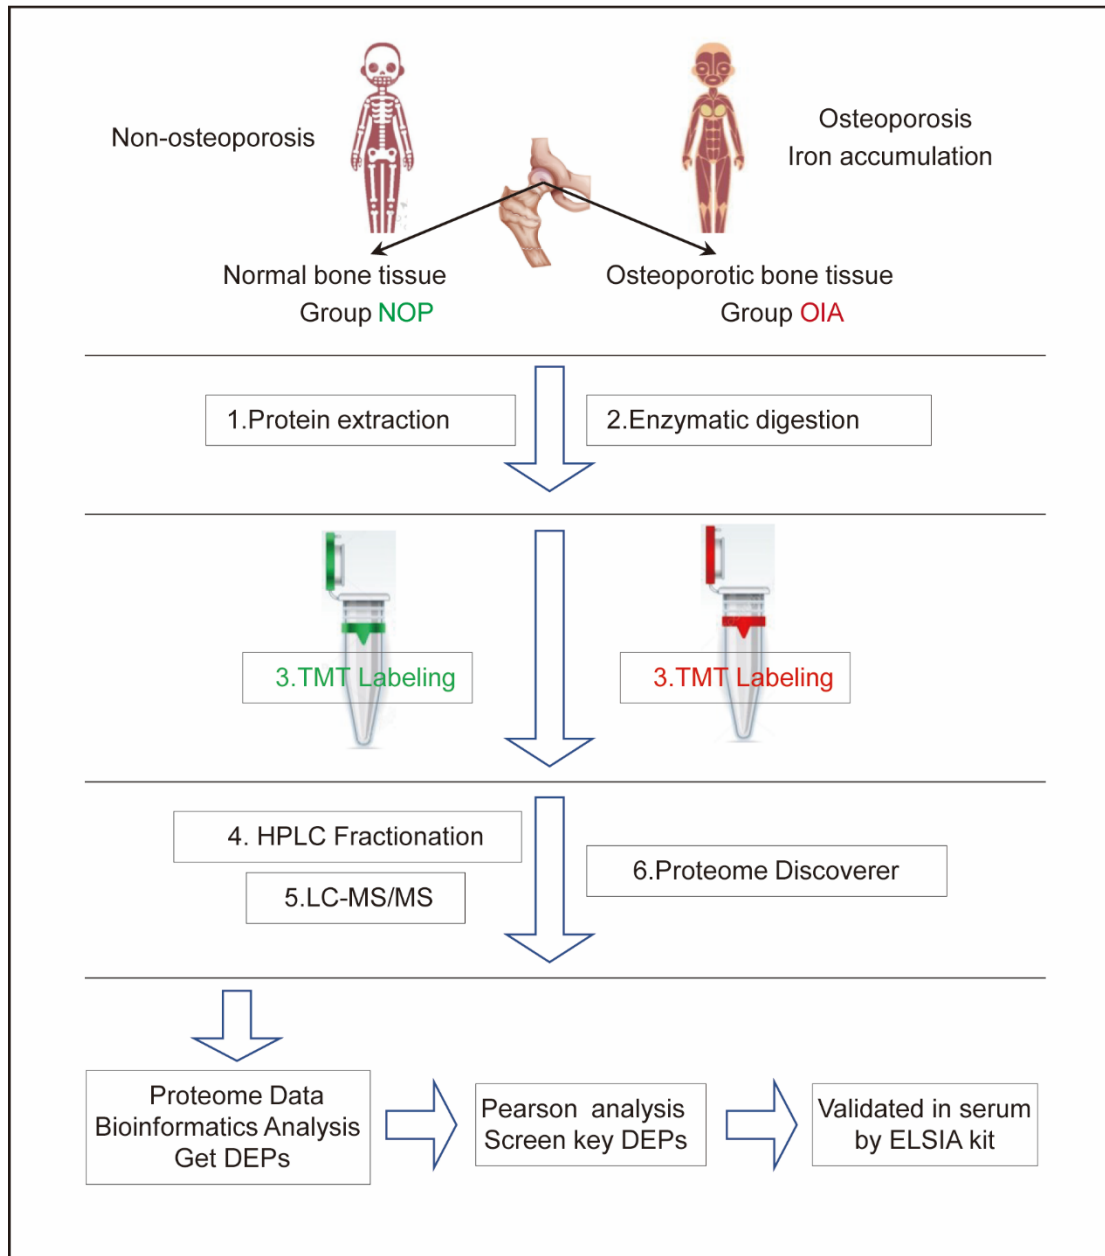

**Supplementary Figure 3 |** Quantitative proteomics workflow and general analysis of human clinical bone tissues. Workflow for quantitative mass spectrometry profiling. For data acquisition, we grouped the 10 samples into 2 experimental groups for 10-plex LC–MS/MS tandem mass tag (TMT) isobaric labelling. For data processing and quantification, we used TMT-Integrator and generated a combined protein expression matrix for several experiments used for downstream analyses, including hierarchical clustering, differential expression tests, statistical analysis, and biological inference.

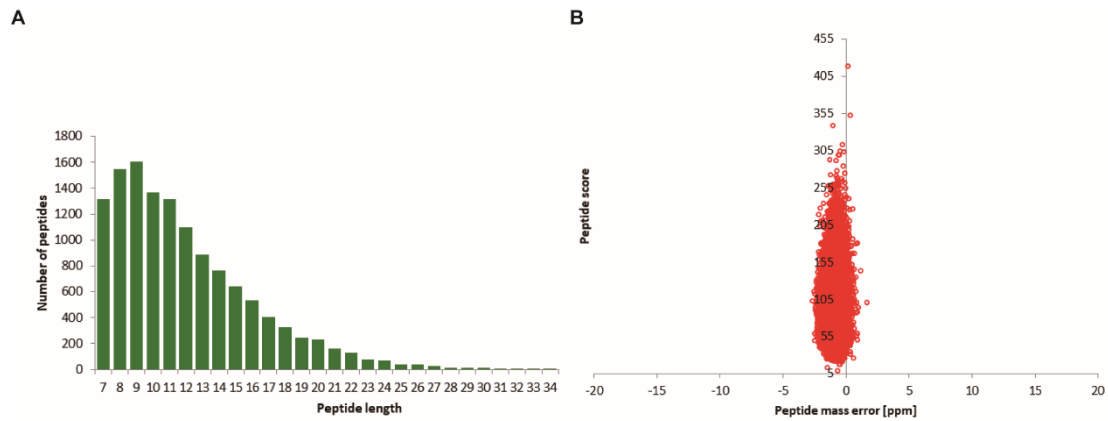

**Supplementary Figure 4 |** Proteome measurement in human bone tissue meets the quality control requirements. **(A)** Length distribution of all identified peptides. Most of the peptides contain between 7 and 20 amino acids, which is in line with the general rules based on trypsin enzymatic hydrolysis and HCD fragmentation. The distribution of peptide lengths identified by mass spectrometry meets the quality control requirements. **(B)** Mass accuracy distribution of the mass spectrometer. The first-order mass error of most spectra is within 5 ppm, which is in line with the high-precision characteristics of Orbitrap mass spectrometry.

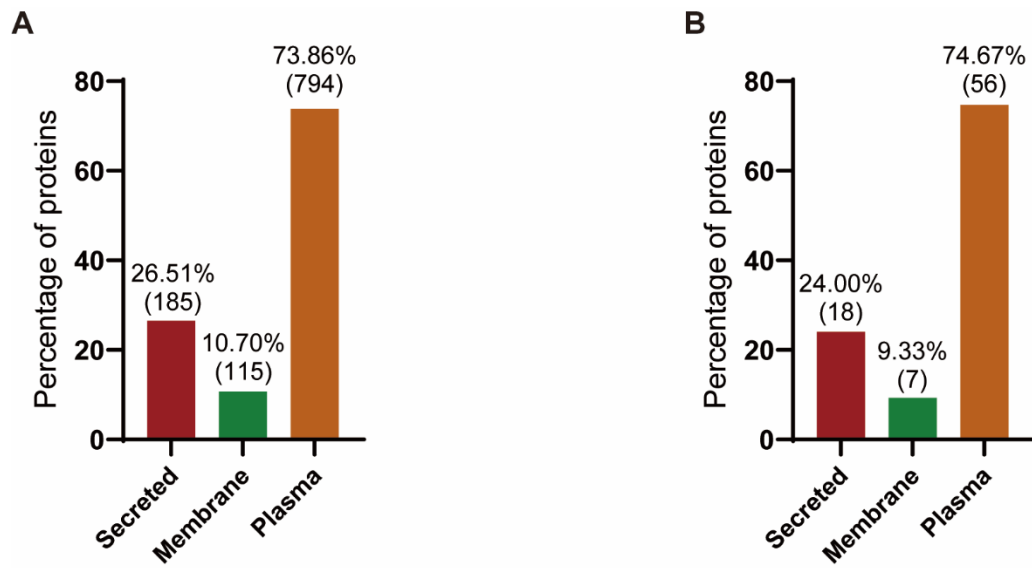

**Supplementary Figure 5 | Protein types of non-differentially expressed and DEPs. (A)** The number and percentage of secreted proteins, membrane proteins and plasma proteins among the no-differentially expressed proteins. **(B)** The number and percentage of secreted proteins, membrane proteins and plasma proteins among the differentially expressed proteins.

**Supplementary Table 1** | Number of DEPs contained in Murine OB/OC genes.

|                 | Included DEPs | Percentage of all DEPs |
|-----------------|---------------|------------------------|
| Murine OB genes | 66            | 88%                    |
| Murine OC genes | 54            | 72%                    |

**Supplementary Table 2** | Person analysis of protein level and bone mass in patients.

|       |         |           |         |         |         |         |          |
|-------|---------|-----------|---------|---------|---------|---------|----------|
|       |         | UBA6      | PSMD3   | TXNL1   | CALU    | CD5L    | SH3BGRL  |
| Hip-T | R       | .718*     | .363    | .471    | .784**  | .430    | .553     |
| score | P Value | .019      | .302    | .169    | .007    | .215    | .098     |
|       |         | F13B      | TPM3    | TUBB    | PFN1    | ELANE   | GSTP1    |
| Hip-T | R       | -.631     | .567    | .773**  | -.614   | -.821** | -.667*   |
| score | P Value | .051      | .088    | .009    | .059    | .004    | .035     |
|       |         | ITIH2     | IBSP    | CPN2    | GCSH    | PSMA2   | FKBP2    |
| Hip-T | R       | -.561     | -.586   | .659*   | .791**  | .649*   | .627     |
| score | P Value | .092      | .075    | .038    | .006    | .043    | .052     |
|       |         | SERPINB10 | NDUFV1  | HNMT    | HSD17B4 | COPB1   | RAD23A   |
| Hip-T | R       | .609      | .727*   | .759*   | -.780** | .862**  | .533     |
| score | P Value | .062      | .017    | .011    | .008    | .001    | .112     |
|       |         | HNRNPU    | RPL18   | CRYZ    | LTBP1   | PTGR1   | SEPT2    |
| Hip-T | R       | .777**    | .776**  | .770**  | -.630   | .796**  | .714*    |
| score | P Value | .008      | .008    | .009    | .051    | .006    | .020     |
|       |         | FLOT1     | H6PD    | SDPR    | GOT2    | PGK1    | F10      |
| Hip-T | R       | .663*     | .634*   | -.705*  | .576    | -.792** | -.561    |
| score | P Value | .037      | .049    | .023    | .081    | .006    | .092     |
|       |         | QDPR      | TPM1    | CNP     | CLU     | LAMP1   | CKB      |
| Hip-T | R       | .546      | .844**  | .807**  | -.643*  | -.717*  | .764*    |
| score | P Value | .102      | .002    | .005    | .045    | .020    | .010     |
|       |         | ATP5D     | CMPK1   | YWHAB   | SAA4    | IGFALS  | DLST     |
| Hip-T | R       | .789**    | .836**  | .675*   | -.471   | -.631   | .718*    |
| score | P Value | .007      | .003    | .032    | .169    | .051    | .019     |
|       |         | ADK       | RAB5B   | RPS7    | CALM1   | SNRPD1  | RPL11    |
| Hip-T | R       | .684*     | -.775** | .667*   | .747*   | -.651*  | .724*    |
| score | P Value | .029      | .008    | .035    | .013    | .042    | .018     |
|       |         | TXNRD1    | DCXR    | PGM2    | COL12A1 | TUBB6   | SH3BGRL3 |
| Hip-T | R       | .699*     | .582    | .596    | .790**  | .712*   | .765**   |
| score | P Value | .025      | .077    | .069    | .007    | .021    | .010     |
|       |         | IGHG1     | IGHA2   | IGLV743 | GNAS    | TUBA4A  | NUCB2    |
| Hip-T | R       | .725*     | .553    | -.521   | .681*   | -.672*  | .698*    |
| score | P Value | .018      | .098    | .122    | .030    | .033    | .025     |
|       |         | LAMP2     | DARS    | ORM2    | PPA2    | NENF    | COPS3    |
| Hip-T | R       | -.773**   | .750*   | -.511   | .739*   | .757*   | .658*    |
| score | P Value | .009      | .012    | .131    | .015    | .011    | .039     |
|       |         | ANP32A    | NSF     | RPL28   |         |         |          |
| Hip-T | R       | .680*     | -.784** | .776**  |         |         |          |
| score | P Value | .030      | .007    | .008    |         |         |          |

\* $p < 0.05$ , \*\* $p < 0.01$



**Supplementary Table 3** | Person analysis of protein level and serum ferritin in patients.

|     |         |              |              |         |         |              |              |
|-----|---------|--------------|--------------|---------|---------|--------------|--------------|
|     |         | UBA6         | PSMD3        | TXNL1   | CALU    | CD5L         | SH3BGRL      |
| Fer | R       | -.381        | -.529        | -.449   | -.353   | -.474        | -.417        |
|     | P Value | .277         | .116         | .193    | .316    | .166         | .230         |
|     |         | F13B         | TPM3         | TUBB    | PFN1    | ELANE        | <b>GSTP1</b> |
| Fer | R       | .327         | -.513        | -.408   | .370    | .422         | .645*        |
|     | P Value | .356         | .129         | .242    | .292    | .225         | .044         |
|     |         | ITIH2        | IBSP         | CPN2    | GCSH    | PSMA2        | FKBP2        |
| Fer | R       | .363         | .418         | -.489   | -.389   | -.537        | -.326        |
|     | P Value | .303         | .230         | .152    | .266    | .110         | .358         |
|     |         | SERPINB10    | NDUFV1       | HNMT    | HSD17B4 | <b>COPB1</b> | RAD23A       |
| Fer | R       | -.462        | -.581        | -.339   | .516    | -.638*       | -.456        |
|     | P Value | .179         | .078         | .338    | .127    | .047         | .185         |
|     |         | HNRNPU       | RPL18        | CRYZ    | LTBP1   | PTGR1        | SEPT2        |
| Fer | R       | -.583        | -.419        | -.382   | .436    | -.445        | -.368        |
|     | P Value | .077         | .228         | .276    | .207    | .197         | .296         |
|     |         | FLOT1        | H6PD         | SDPR    | GOT2    | PGK1         | F10          |
| Fer | R       | -.519        | -.414        | .482    | -.338   | .595         | .429         |
|     | P Value | .124         | .234         | .158    | .340    | .070         | .216         |
|     |         | QDPR         | TPM1         | CNP     | CLU     | LAMP1        | CKB          |
| Fer | R       | -.460        | -.567        | -.452   | .475    | .606         | -.386        |
|     | P Value | .181         | .087         | .190    | .165    | .063         | .271         |
|     |         | ATP5D        | CMPK1        | YWHAB   | SAA4    | IGFALS       | DLST         |
| Fer | R       | -.554        | -.446        | -.455   | .482    | .342         | -.378        |
|     | P Value | .096         | .196         | .186    | .158    | .334         | .282         |
|     |         | ADK          | <b>RAB5B</b> | RPS7    | CALM1   | SNRPD1       | RPL11        |
| Fer | R       | -.407        | .690*        | -.365   | -.603   | .603         | -.516        |
|     | P Value | .243         | .027         | .299    | .065    | .065         | .127         |
|     |         | TXNRD1       | DCXR         | PGM2    | COL12A1 | TUBB6        | SH3BGRL3     |
| Fer | R       | -.448        | -.561        | -.383   | -.365   | -.573        | -.537        |
|     | P Value | .194         | .092         | .275    | .299    | .083         | .110         |
|     |         | IGHG1        | IGHA2        | IGLV743 | GNAS    | TUBA4A       | NUCB2        |
| Fer | R       | -.307        | -.424        | .535    | -.416   | .336         | -.421        |
|     | P Value | .388         | .222         | .111    | .231    | .342         | .226         |
|     |         | <b>LAMP2</b> | DARS         | ORM2    | PPA2    | NENF         | COPS3        |
| Fer | R       | .648*        | -.468        | .367    | -.451   | -.431        | -.509        |
|     | P Value | .043         | .173         | .297    | .191    | .213         | .133         |
|     |         | ANP32A       | NSF          | RPL28   |         |              |              |
| Fer | R       | -.380        | .580         | -.363   |         |              |              |
|     | P Value | .278         | .079         | .302    |         |              |              |

\*p&lt;0.05, \*\*p&lt;0.01
